# Supplementary material for: Towards an Informal Leadership Framework for Interprofessional Primary Care: An Interview Study Among Healthcare Leadership Experts
Source: Research Square preprint supplement (doi:10.21203/rs.3.rs-7085121/v1), 2025-08-06
Supplement: Supplementary file 1 [file 5213c6c689f042ac9074ccdf.docx]

**Additional file 1**

**Topic List and Interview Guide:
Leadership in Interprofessional Primary Care for Older Adults**

1. Leadership Needs in a Complex Primary Care Setting

- What kind of leaders do we need to effectively address the increasing complexity of primary care?

2. Characteristics of Leadership

- Personalities: What kind of personalities characterize the required leadership?
- Competencies: What competencies are necessary to fulfill the required leadership?
- Leadership Styles: What types of leadership does primary care need?

3. Leadership Vision and Underlying Theories

- Leadership Theory:
  On which leadership theory do you base your vision?
- Important Elements:
  What elements of this leadership theory are most important in this case?
- Opposing Theories:
  Which leadership theory do you find unsuitable in this setting, and why?

4. Followership (1)

- How does followership relate to leadership in this context?
- What is the role of followership in supporting leadership?

5. Transformational Leadership (2-4)

- Relevance:
  How do you perceive transformational leadership in this context?
- Pitfalls:
  What are the challenges or pitfalls of transformational leadership in this context?

6. Leadership Roles of General Practitioners

- Interprofessional Team Level:
  What leadership role does the GP fulfill at the interprofessional team level?
- Community Level:
  What leadership role does the GP fulfill at the community level?
- Role Categorization:
  - *Every GP:* What leadership tasks should every GP undertake?
  - *Some GPs:* What leadership tasks will only some GPs take on?
  - *A Few GPs:* What leadership tasks are reserved for only a few GPs?

7. Shared Leadership (5, 6)

- Relation to Other Professions:
  How does GP leadership relate to leadership by other professions?
- Complementarity:
  How can GPs and other professions complement each other effectively?
- Competition:
  Where is there competition between GPs and other professions?
- Conflict:
  When do GPs and other professions obstruct one another?

8. Enabling GP Leadership

- Requirements:
  What is needed to achieve the leadership you described?
  - Examples: Changes in mindset, setting, organizational agreements, funding, or training.
- Strategy:
  What strategies align with this vision?
- Consequences of Absence:
  What issues could arise if this leadership is lacking in the described context?

9. Measuring Leadership

- What is the best way to measure leadership in this context?

10. Closing Question

- Keywords:
  What are the key terms, in your view, that describe future-proof leadership in interprofessional care for frail older patients?

**References**

1. Varpio L, Teunissen P. Leadership in interprofessional healthcare teams: Empowering knotworking with followership. Medical Teacher. 2021;43(1):32-7.

2. Forsyth C, Mason B. Shared leadership and group identification in healthcare: The leadership beliefs of clinicians working in interprofessional teams. Journal of Interprofessional Care. 2017;31(3):291-9.

3. Grol R, Wensing M, Bosch M, Hulscher M, Eccles M. Theories on implementation of change in healthcare. Improving Patient Care2013. p. 18-39.

4. Ahmed Khan Z, Nawaz A, Khan I. Leadership Theories and Styles: A Literature Review. Journal of Resources Development and Management. 2016;16.

5. Cummings G, Lee H, Macgregor T, Davey M, Wong C, Paul L, Stafford E. Factors contributing to nursing leadership: A systematic review. Journal of Health Services Research & Policy. 2008;13(4):240-8.

6. Wind A, Te Velde B, Neumann R, Zwart H, Blom A. Kwetsbare ouderen thuis. Handreiking voor integrale zorg en ondersteuning in de wijk. [Vulnerable elderly at home: Guidelines for integrated care and support in the community.]. In: Ministerie van Volksgezondheid Welzijn en Sport, editor. 2021.
